# Supplementary material for: A Whole Genome Sequencing-Based Epidemiological Investigation of a Pregnancy-Related Invasive Listeriosis Case in Central Italy
Source: MDPI journal article supplement (doi:10.3390/pathogens11060667), 2022-06-08
Supplement: s1 [file s1]

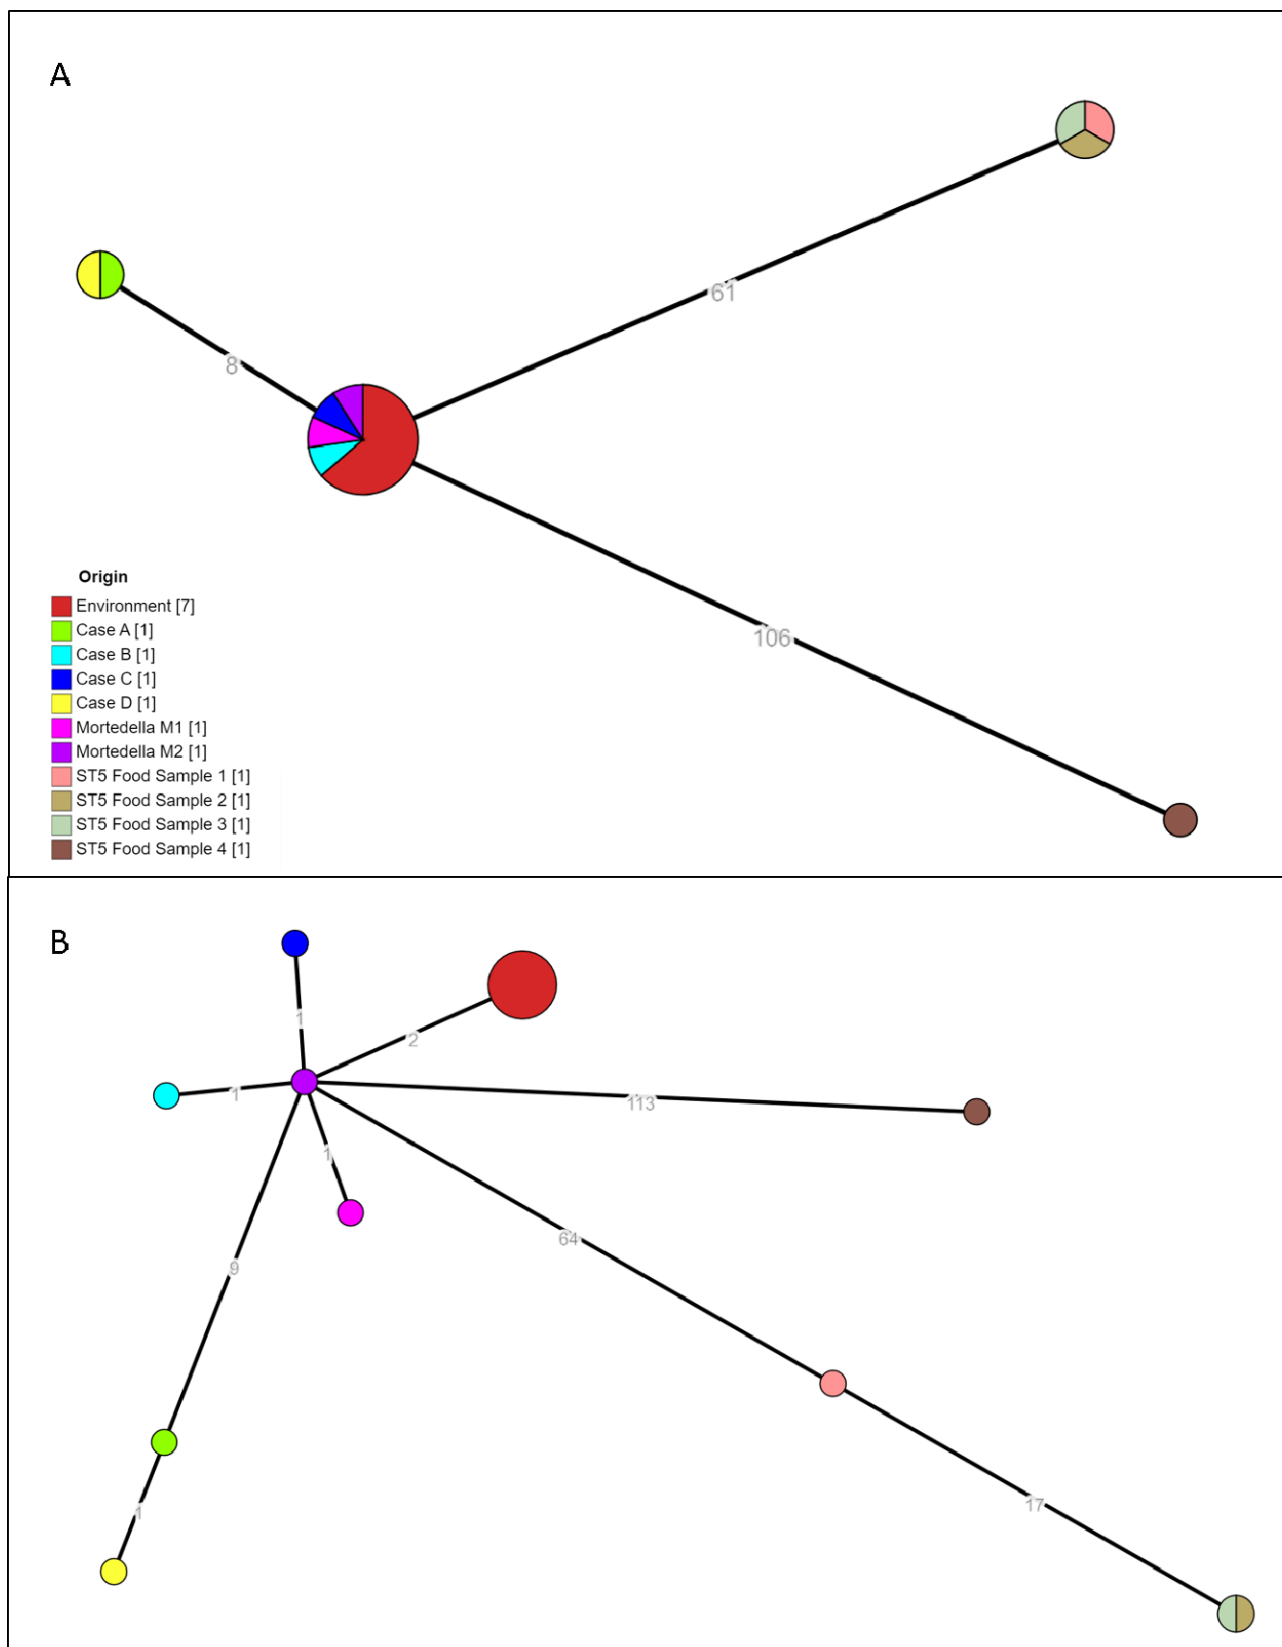

**Figure S1.** Core genome MLST characterizations of isolates from the main investigation and other ST5 food samples, assessed with the two softwares cgMLSTFinder (**A**) and chewBBACA (**B**).
