# Supplementary material for: A Whole Genome Sequencing-Based Epidemiological Investigation of a Pregnancy-Related Invasive Listeriosis Case in Central Italy
Source: MDPI journal article supplement (doi:10.3390/pathogens11060667), 2022-06-08
Supplement: s1 [file s1]

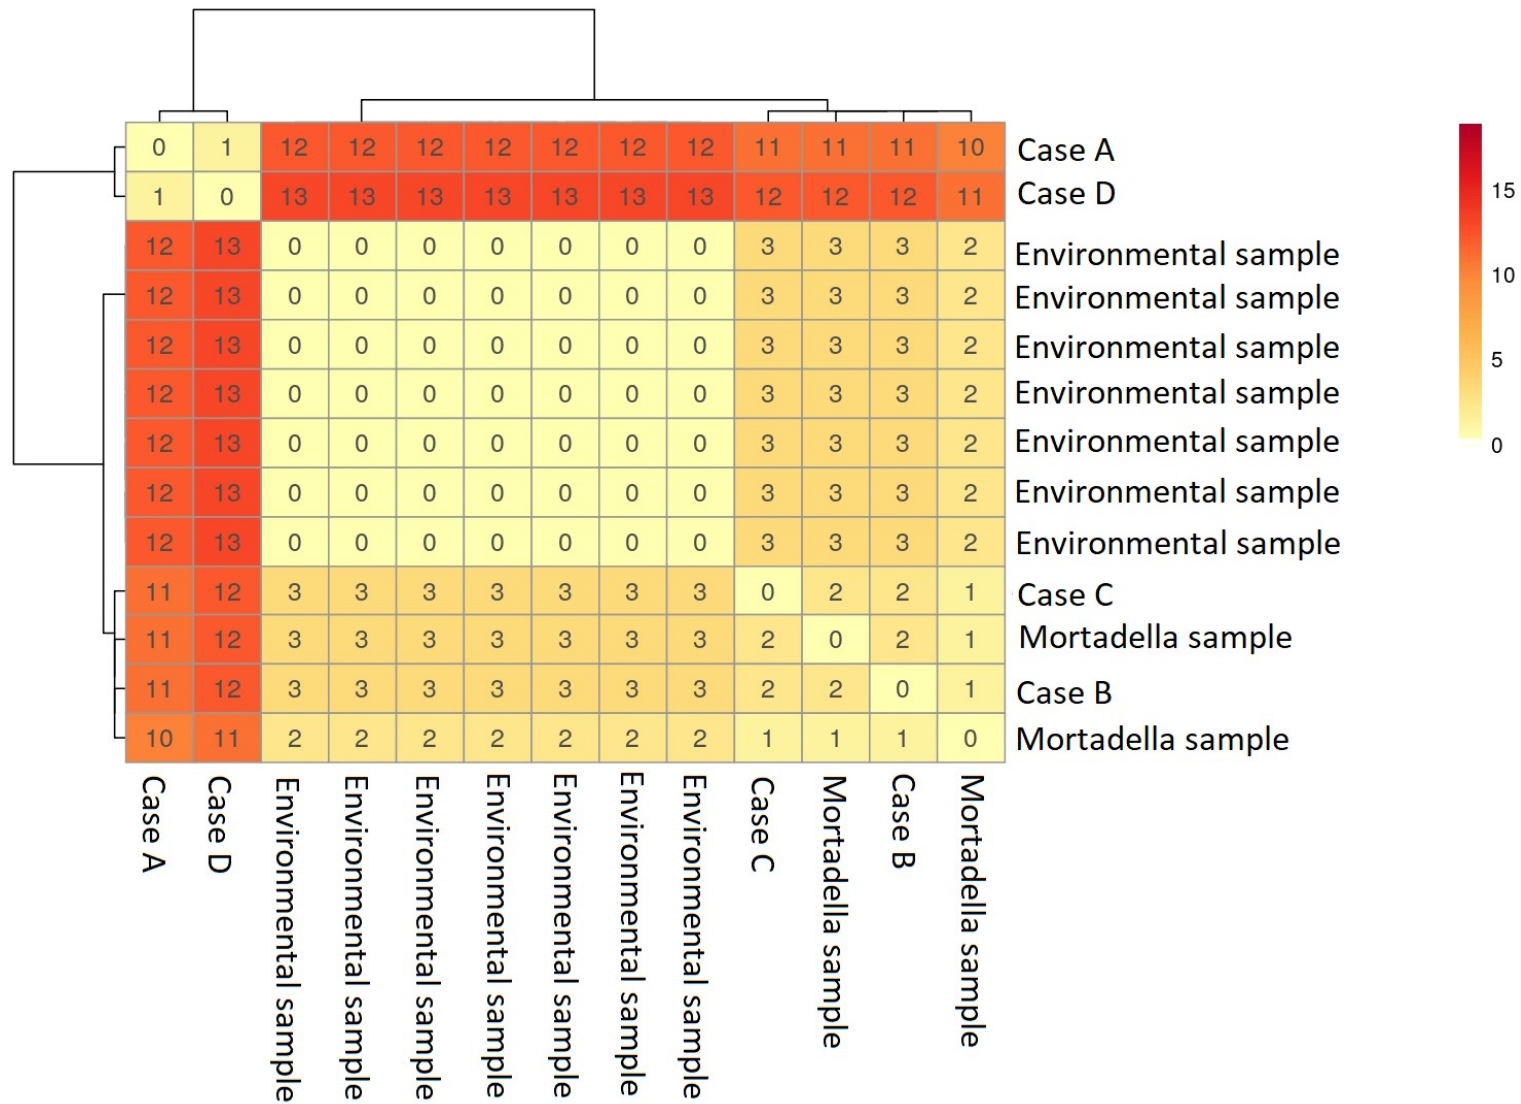

**Figure S2.** SNPs matrix-based heatmap showing the variation in core genome SNPs between the strains considered in this study.
