# Supplementary material for: A Whole Genome Sequencing-Based Epidemiological Investigation of a Pregnancy-Related Invasive Listeriosis Case in Central Italy
Source: Pathogens. 2022 Jun 8;11(6):667. doi: 10.3390/pathogens11060667 (PMC9228178; doi:10.3390/pathogens11060667)
Supplement: Supplementary file 1 [file pathogens-11-00667-s001.zip › Supplementary Table S1.xlsx]

## Sheet: Supplementary Table1
Table S1. Schematic summary of the presence (+) and the absence (-) of the principal stress response genes found in the strains. Name of loci are those reported in BIGSdb-Lm platform. QAC - Quaternary Ammonium Compound; MFS - Major Facilitator Superfamily; MATE - Multidrug and Toxic Compounds Extrusion pumps; SMR - Small Multidrug Resistance Efflux Pumps.
	Antibioic resitance	lmo0919 (lin)	+
		norB (lmo2818)	+
		sul (lmo0224)	+
		fosX (lmo1702)	+
		mprF (NC_003210)	+
Quaternary Ammonium Compound resistance	QAC	Tn6188_qac (ermC)	-
		qacA	-
Heavy metal resistance genes	Arsenic resistance	arsC (lmo2191)	+
		arsR (lmo2493)	+
		LGI-2_LMOSA2270 (arsB1)	-
		LGI-2_LMOSA2280 (arsB2)	-
		LGI-2_LMOSA2210 (arsD1)	-
		LGI-2_LMOSA2240 (arsD2)	-
		LGI-2_LMOSA2250 (arsR2)	-
	Cadmium resistance	cadA (lmo1100)	-
		cadC (lmo1102)	-
		LGI-2_LMOSA2330 (cadA)	-
		LGI-2_LMOSA2321 (cadC)	-
		LGI-3_LmUB3PA_1702 (cadA)	+
		LGI-3_LmUB3PA_1701 (cadC)	+
	Copper resiastance	copB (lmo1147)	+
		copper transporter (lmo2062)	+
		cutC (lmo0026)	+
Stress survival determinants and islands	Osmotic stress resistence	gbuA (lmo1014)	+
		gbuB (lmo1015)	+
		gbuC (lmo1016)	+
	Stress Islands	SSI1 (lmo0444-lmo0448)	+
		SSI2 (lmo0464-lmo0465)	-
Multidrug efflux-pumps	MFS	lde (lmo2741)	+
		mdrL (lmo1409)	+
	MATE	norM_1	+
		norM_2	+
		mepA (lmo0990)	+
	SMR	sugE (lmo0853)	+
		sugE (lmo0854)	+
	Other Listeria Genomic Islands	LGI-2_LMOSA2310	+
		LGI-2_LMOSA2320	+
		LGI-3_LmUB3PA_1699	+
		LGI-3_LmUB3PA_1700 (hin)	+
